# Supplementary material
Source: MDPI journal article supplement (https://www.mdpi.com/2076-3417/12/9/4544)
Supplement: s1 [file s1]

**Title: Investigation on functional, thermo-mechanical and bread-making properties of some white and black rice flours**

*Applied Sciences*

***Supplementary material***

*Table S1.* Correlations between solvent retention capacity and main chemical components found in the rice flours

| Parameters | Protein    | Fiber      | Amylose    | Starch damage |
|------------|------------|------------|------------|---------------|
| Na-SRC     | 0.9974*    | 0.3592***  | -0.9839*** | -0.7756***    |
| LA-SRC     | 0.9957*    | 0.4741***  | -0.9999**  | -0.6714***    |
| Ca-SRC     | 0.7875***  | 0.8498***  | -0.9939*   | -0.2706***    |
| Su-SRC     | 0.4521***  | 0.9981*    | -0.5280*** | -0.0367***    |
| SC-SRC     | -0.6700*** | -0.0067*** | 0.5968***  | 0.9953*       |

Na-SRC – NaCl solvent retention capacity; LA-SRC - lactic acid solvent retention capacity; Ca-SRC - CaCl<sub>2</sub> solvent retention capacity; Su-SRC - sucrose solvent retention capacity; SC-SRC - sodium carbonate solvent retention capacity.

\* Correlation is significant at  $p < 0.05$

\*\* Correlation is significant at  $p < 0.01$

\*\*\* Correlation is not significant
